# Supplementary material for: Robot-aided Assessment and Associated Brain Lesions of Impaired Ankle Proprioception in Chronic Stroke
Source: Research Square preprint supplement (doi:10.21203/rs.3.rs-3224742/v1), 2023-08-08

# Additional File

**Figure**: lesion subtraction analysis for ankle proprioceptive bias as measured by JND threshold. A. Lesions associated with abnormal JND of position sense. B. Lesions associated with abnormal JND of motion sense. The color bar indicates the frequency of lesion overlap across participants with abnormal JND. Only regions with the frequency >20% are shown. C. Superimposed maps indicating the overlap across the two senses. Yellow areas indicate lesion sites associated with abnormal position sense JND, blue areas indicate lesion sites associated with abnormal motion sense JND. Red indicates the region of overlap that is associated with abnormal position and motion sense JND. Data are based on n=11 participants.


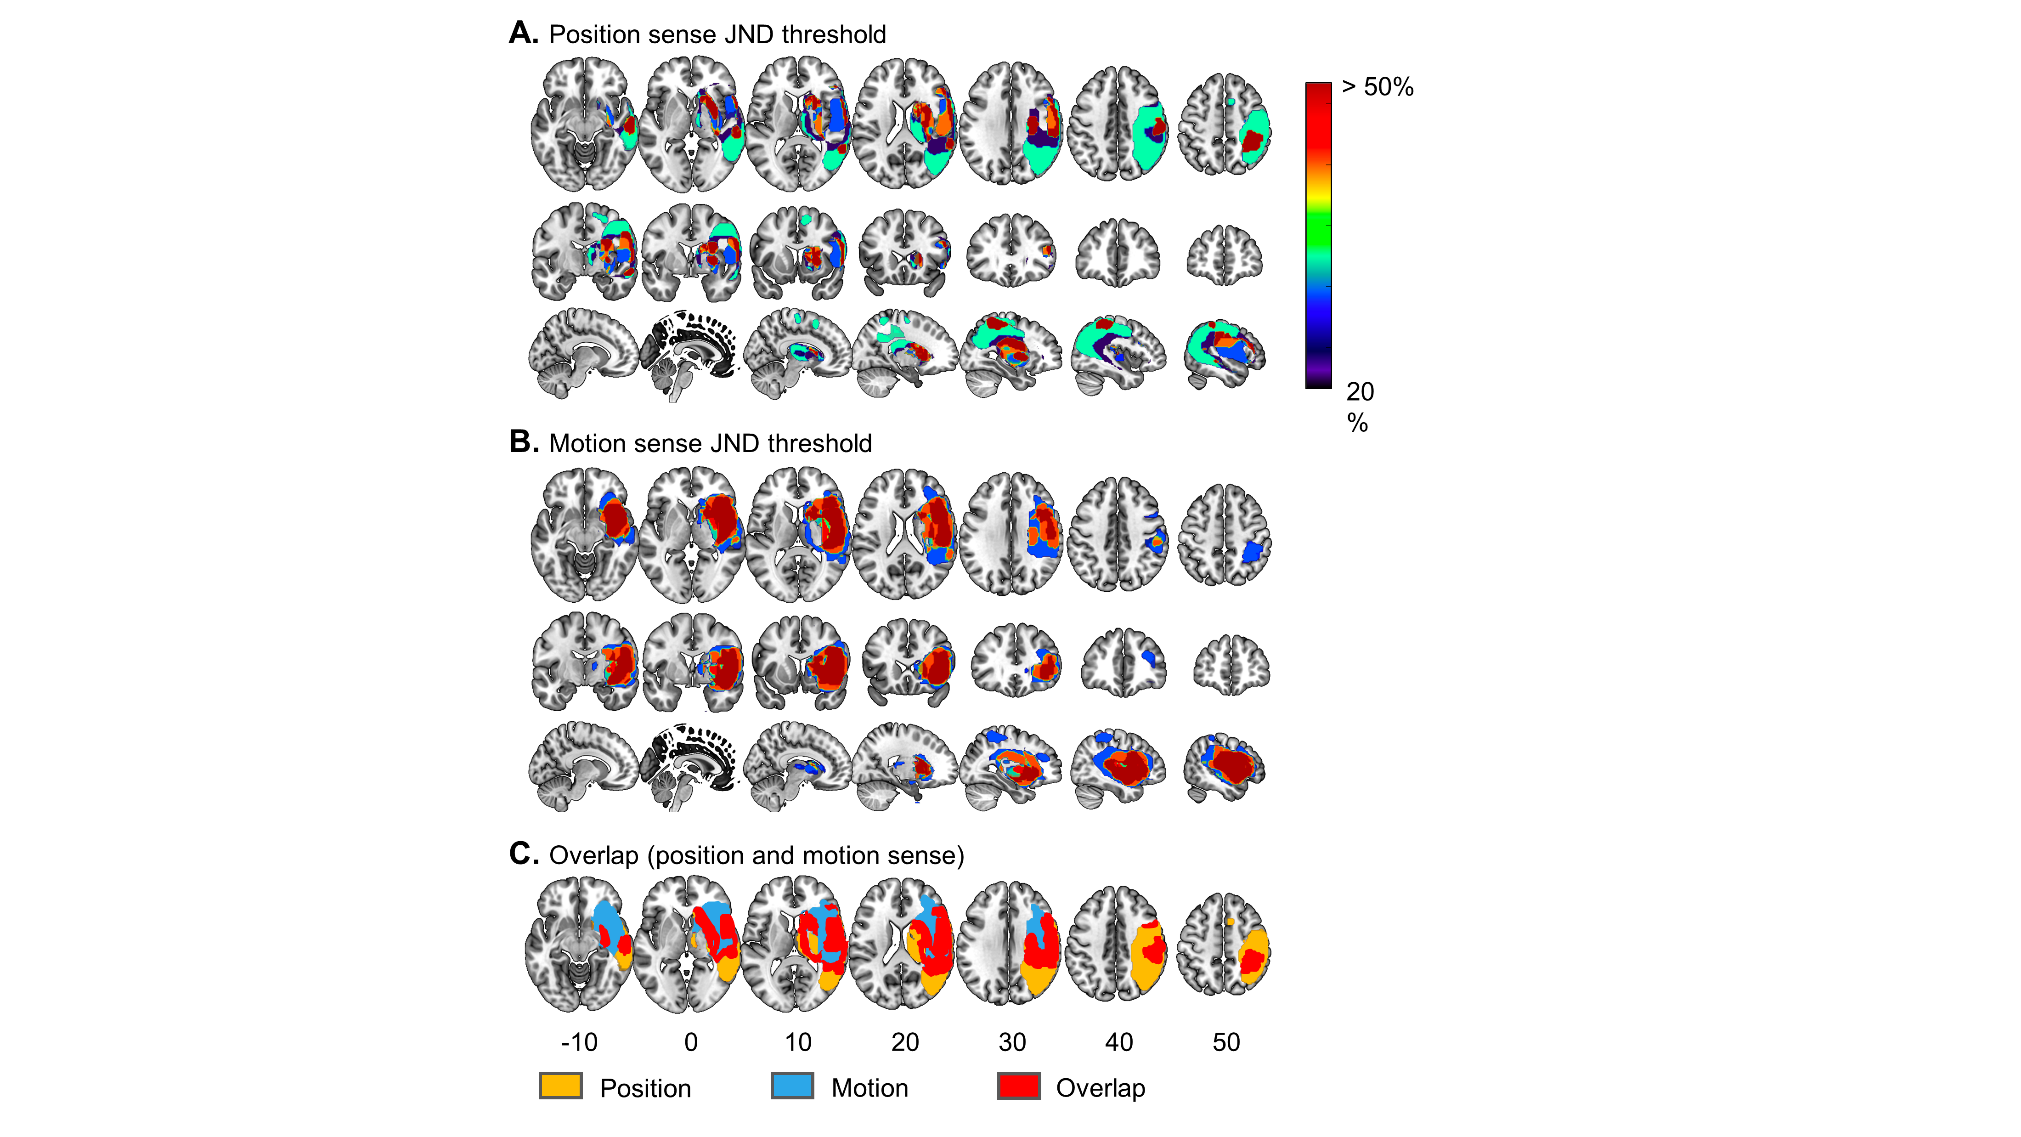


**Figure**: lesion subtraction analysis for ankle proprioceptive precision as measured by IU. **A.** Lesions associated with abnormal IU of position sense. **B.** Lesions associated with abnormal IU of motion sense. The color bar indicates the frequency of lesion overlap across participants with abnormal IU. Only regions with the frequency >20% are shown. **C.** Superimposed maps indicating the overlap across the two senses. Yellow areas indicate lesion sites associated with abnormal position sense IU, blue areas indicate lesion sites associated with abnormal motion sense IU. Red indicates the region of overlap that is associated with abnormal position and motion sense IU. Data are based on n=11 participants.


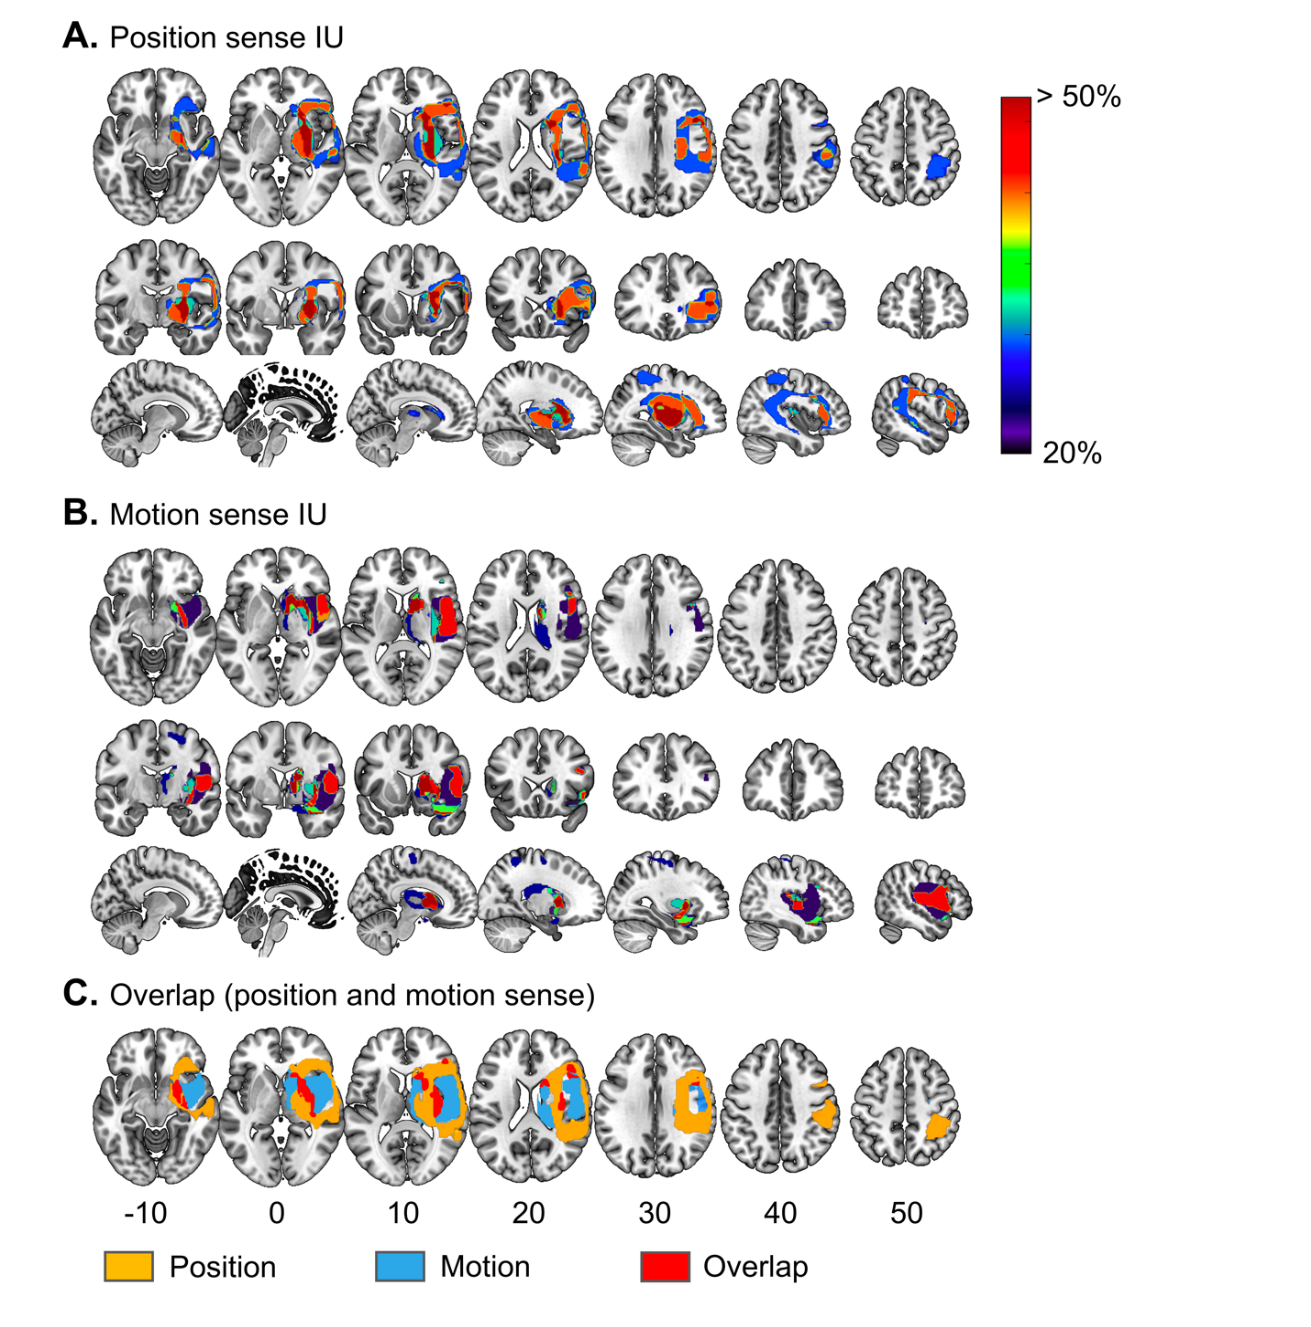

Supplement: Supplementary file 1 [file b289ad2b1d61b4c9d599548e.docx]
